# Supplementary material
Source: HighWire-hosted journal article supplement (https://bmjopen.bmj.com/content/11/12/e055823)
Supplement: inline-supplementary-material-1 [file inline-supplementary-material-1.pdf]

### Supplementary file 1: Search strategy: keywords and MeSH terms for systematic search of the literature

| MEDLINE search strategy            |                                     |                                                                                                                                                                                                                                                                                                                                                                                                                                                                                                                                                                                                                                                                                                                                                                                                                                                                                                                                                                                                                                                                                                                                             |
|------------------------------------|-------------------------------------|---------------------------------------------------------------------------------------------------------------------------------------------------------------------------------------------------------------------------------------------------------------------------------------------------------------------------------------------------------------------------------------------------------------------------------------------------------------------------------------------------------------------------------------------------------------------------------------------------------------------------------------------------------------------------------------------------------------------------------------------------------------------------------------------------------------------------------------------------------------------------------------------------------------------------------------------------------------------------------------------------------------------------------------------------------------------------------------------------------------------------------------------|
| Search term                        | MeSH heading                        | Free text                                                                                                                                                                                                                                                                                                                                                                                                                                                                                                                                                                                                                                                                                                                                                                                                                                                                                                                                                                                                                                                                                                                                   |
| <b>Telehealth</b>                  | Telemedicine<br>Remote consultation | (Telehealth OR tele-health OR telemedicine or Tele-medicine OR telecare OR tele-care OR telehomecare OR tele-homecare OR telehealthcare OR tele-healthcare OR teleconsultation OR tele-consultation OR "video consultation" OR video-consultation OR videoconference OR video-conference OR "video conferencing" OR teleconference OR tele-conference OR telecommunication OR tele-communication OR tele-monitoring OR telemonitoring OR telerehab* OR tele-rehab* OR telecoaching OR tele-coaching OR ehealth OR e-health OR "electronic health" OR ecare OR e-care OR "electronic care" OR "digital health" OR mhealth OR m-health OR "mobile health" OR ethody OR e-therapy OR "electronic therapy")<br><br>(online OR on-line OR virtual OR internet-based OR web OR web-based OR remote OR distant OR electronic OR instant OR telematic OR interactive OR telephone OR video OR mobile OR phone OR internet OR computer OR "computer assisted" OR computer-assisted OR "computer aided" OR computer-aided) AND (rehab* OR therapy OR treatment OR care OR consultation OR counselling OR monitoring OR surveillance OR communication) |
| <b>Allied Health Professional</b>  | Allied health personnel             | ("Allied health" OR "non-medical health-care" OR "non-medical healthcare" OR paramedical) AND (profession* OR occupation* OR personnel OR worker OR staff OR professional* OR specialist* OR practitioner* OR workforce)                                                                                                                                                                                                                                                                                                                                                                                                                                                                                                                                                                                                                                                                                                                                                                                                                                                                                                                    |
| Art Therapists                     | Art therapy                         | ("Art therapist*" OR "art therapy")                                                                                                                                                                                                                                                                                                                                                                                                                                                                                                                                                                                                                                                                                                                                                                                                                                                                                                                                                                                                                                                                                                         |
| Drama therapists                   |                                     | ("Drama therapist*" OR artist*)                                                                                                                                                                                                                                                                                                                                                                                                                                                                                                                                                                                                                                                                                                                                                                                                                                                                                                                                                                                                                                                                                                             |
| Music therapists                   | Music therapy                       | ("Music therapist*" OR "music therapy")                                                                                                                                                                                                                                                                                                                                                                                                                                                                                                                                                                                                                                                                                                                                                                                                                                                                                                                                                                                                                                                                                                     |
| Chiropodists/podiatrists           | Podiatry                            | (Chiropodist* OR podiatrist* OR "podiatry")                                                                                                                                                                                                                                                                                                                                                                                                                                                                                                                                                                                                                                                                                                                                                                                                                                                                                                                                                                                                                                                                                                 |
| Dietitians                         | Nutritionists                       | (Dietitian* OR dietician* OR "dietetic services" OR nutritionist*)                                                                                                                                                                                                                                                                                                                                                                                                                                                                                                                                                                                                                                                                                                                                                                                                                                                                                                                                                                                                                                                                          |
| Occupational therapists            | Occupational therapists             | ("Occupational therapist*" OR "occupational therapy" OR "occupational rehabilitation")                                                                                                                                                                                                                                                                                                                                                                                                                                                                                                                                                                                                                                                                                                                                                                                                                                                                                                                                                                                                                                                      |
| Operating Department Practitioners |                                     | ("Operating department practitioner*")                                                                                                                                                                                                                                                                                                                                                                                                                                                                                                                                                                                                                                                                                                                                                                                                                                                                                                                                                                                                                                                                                                      |
| Orthoptists                        | Orthoptics                          | (Orthoptist*)                                                                                                                                                                                                                                                                                                                                                                                                                                                                                                                                                                                                                                                                                                                                                                                                                                                                                                                                                                                                                                                                                                                               |
| Osteopaths                         | Osteopathic medicine                | (Osteopath* OR "osteopathic medicine")                                                                                                                                                                                                                                                                                                                                                                                                                                                                                                                                                                                                                                                                                                                                                                                                                                                                                                                                                                                                                                                                                                      |

|                                |                     |                                                                                                                                                                                                                                                                   |
|--------------------------------|---------------------|-------------------------------------------------------------------------------------------------------------------------------------------------------------------------------------------------------------------------------------------------------------------|
| Paramedics                     |                     | (Paramedic* OR “paramedical profession” OR “paramedical personnel” OR “paramedicine” OR “ambulance paramedic*” OR “ambulance staff*” OR “ambulance technician”                                                                                                    |
| Physiotherapists               | Physical therapists | (Physiotherapist* OR “physical therapist*” OR physiotherapy OR “physical therapy” OR “exercise therapist*” OR “rehabilitation therapist”)                                                                                                                         |
| Prosthetists and Orthotists    |                     | (Prosthetist* OR prosthetic*)<br>(Orthotist* OR orthotic*)                                                                                                                                                                                                        |
| Radiographers                  |                     | (Radiographer* OR radiotherapy OR “radiologic technologist*” OR “radiologic technician*” OR “radiological technologist*” OR “radiology personnel”)                                                                                                                |
| Speech and language therapists |                     | (“Speech and language therapist*” OR “speech therapist” OR “speech therapy” OR “speech rehabilitation” OR “language therapist” OR “language pathology” OR “language therapy” OR “speech and language pathologist*” OR “speech therapeutic”)                       |
| <b>Guidelines</b>              | Guidelines          | (guideline* OR guidance OR standard* OR pathway* OR protocol* OR advisor* OR summar* OR polic* OR statement* OR blueprint* OR regulation* OR circular* OR recommendation* OR dissemination* OR priority OR reform OR plan OR program* OR agenda OR “declaration”) |

| CINHAL search strategy                |                                                   |                                                                                                                                                                                                                                                                                                                                                                                                                                                                                                                                                                                                                                                                                                                                                                                                                                                                                                                                                                                                                                                                                                                                                                               |
|---------------------------------------|---------------------------------------------------|-------------------------------------------------------------------------------------------------------------------------------------------------------------------------------------------------------------------------------------------------------------------------------------------------------------------------------------------------------------------------------------------------------------------------------------------------------------------------------------------------------------------------------------------------------------------------------------------------------------------------------------------------------------------------------------------------------------------------------------------------------------------------------------------------------------------------------------------------------------------------------------------------------------------------------------------------------------------------------------------------------------------------------------------------------------------------------------------------------------------------------------------------------------------------------|
| Search term                           | MeSH heading                                      | Free text                                                                                                                                                                                                                                                                                                                                                                                                                                                                                                                                                                                                                                                                                                                                                                                                                                                                                                                                                                                                                                                                                                                                                                     |
| <b>Telehealth</b>                     | Telemedicine<br>Teleconferencing                  | (Telehealth OR tele-health OR telemedicine or Tele-medicine OR telecare OR tele-care OR telehomecare OR tele-homecare OR telehealthcare OR tele-healthcare OR teleconsultation OR tele-consultation OR "video consultation" OR video-consultation OR videoconference OR video-conference OR "video conferencing" OR teleconference OR tele-conference OR telecommunication OR tele-communication OR tele-monitoring OR telemonitoring OR telepractice OR telerehab* OR tele-rehab* OR tele-therapy OR telecoaching OR tele-coaching OR ehealth OR e-health OR "electronic health" OR ecare OR e-care OR "electronic care" OR "digital health" OR mhealth OR m-health OR "mobile health" OR etherapy OR e-therapy OR "electronic therapy")<br><br>(online OR on-line OR virtual OR internet-based OR web OR web-based OR remote OR distant OR electronic OR instant OR telematic OR interactive OR telephone OR video OR mobile OR phone OR internet OR computer OR "computer assisted" OR computer-assisted OR "computer aided" OR computer-aided) AND (rehab* OR therapy OR treatment OR care OR consultation OR counselling OR monitoring OR surveillance OR communication) |
| <b>Allied Health Professional</b>     |                                                   | ("Allied health" OR "non-medical health-care" OR "non-medical healthcare" OR paramedical) AND (profession* OR occupation* OR personnel OR worker OR staff OR professional* OR specialist* OR practitioner* OR workforce)                                                                                                                                                                                                                                                                                                                                                                                                                                                                                                                                                                                                                                                                                                                                                                                                                                                                                                                                                      |
| Art Therapists                        | Art therapy                                       | ("Art therapist*" OR "art therapy")                                                                                                                                                                                                                                                                                                                                                                                                                                                                                                                                                                                                                                                                                                                                                                                                                                                                                                                                                                                                                                                                                                                                           |
| Drama therapists                      |                                                   | ("Drama therapist*" OR artist*)                                                                                                                                                                                                                                                                                                                                                                                                                                                                                                                                                                                                                                                                                                                                                                                                                                                                                                                                                                                                                                                                                                                                               |
| Music therapists                      | Music therapy                                     | ("Music therapist*" OR "music therapy")                                                                                                                                                                                                                                                                                                                                                                                                                                                                                                                                                                                                                                                                                                                                                                                                                                                                                                                                                                                                                                                                                                                                       |
| Chiropodists/podiatrists              | Podiatrists                                       | (Chiropodist* OR podiatrist* OR "podiatry")                                                                                                                                                                                                                                                                                                                                                                                                                                                                                                                                                                                                                                                                                                                                                                                                                                                                                                                                                                                                                                                                                                                                   |
| Dietitians                            | Dietitians<br>Dietetic technicians,<br>registered | (Dietitian* OR dietician* OR "dietetic services" OR nutritionist*)                                                                                                                                                                                                                                                                                                                                                                                                                                                                                                                                                                                                                                                                                                                                                                                                                                                                                                                                                                                                                                                                                                            |
| Occupational therapists               | Occupational therapists                           | ("Occupational therapist*" OR "occupational therapy" OR "occupational rehabilitation")                                                                                                                                                                                                                                                                                                                                                                                                                                                                                                                                                                                                                                                                                                                                                                                                                                                                                                                                                                                                                                                                                        |
| Operating Department<br>Practitioners |                                                   | ("Operating department practitioner*")                                                                                                                                                                                                                                                                                                                                                                                                                                                                                                                                                                                                                                                                                                                                                                                                                                                                                                                                                                                                                                                                                                                                        |
| Orthoptists                           |                                                   | (Orthoptist*)                                                                                                                                                                                                                                                                                                                                                                                                                                                                                                                                                                                                                                                                                                                                                                                                                                                                                                                                                                                                                                                                                                                                                                 |
| Osteopaths                            | Osteopaths<br>Osteopathic medicine                | (Osteopath* OR "osteopathic medicine")                                                                                                                                                                                                                                                                                                                                                                                                                                                                                                                                                                                                                                                                                                                                                                                                                                                                                                                                                                                                                                                                                                                                        |

|                                |                               |                                                                                                                                                                                                                                                                   |
|--------------------------------|-------------------------------|-------------------------------------------------------------------------------------------------------------------------------------------------------------------------------------------------------------------------------------------------------------------|
| Paramedics                     | Emergency medical technicians | (Paramedic* OR "paramedical profession" OR "paramedical personnel" OR "paramedicine" OR "ambulance paramedic*" OR "ambulance staff*" OR "ambulance technician"*)                                                                                                  |
| Physiotherapists               | Physical therapists           | (Physiotherapist* OR "physical therapist*" OR physiotherapy OR "physical therapy" OR "exercise therapist*" OR "rehabilitation therapist"*)                                                                                                                        |
| Prosthetists and Orthotists    |                               | (Prosthetist* OR prosthetic*)<br>(Orthotist* OR orthotic*)                                                                                                                                                                                                        |
| Radiographers                  | Radiologic technologists      | (Radiographer* OR radiotherapy OR "radiologic technologist*" OR "radiologic technician*" OR "radiological technologist*" OR "radiology personnel")                                                                                                                |
| Speech and language therapists | Speech-language pathologists  | ("Speech and language therapist*" OR "speech therapist" OR "speech therapy" OR "speech rehabilitation" OR "language therapist" OR "language pathology" OR "language therapy" OR "speech and language pathologist*" OR "speech therapeutic"*)                      |
| <b>Guidelines</b>              | Practice Guidelines           | (guideline* OR guidance OR standard* OR pathway* OR protocol* OR advisor* OR summar* OR polic* OR statement* OR blueprint* OR regulation* OR circular* OR recommendation* OR dissemination* OR priority OR reform OR plan OR program* OR agenda OR "declaration") |
