# Supplementary material
Source: HighWire-hosted journal article supplement (https://bmjopen.bmj.com/content/11/12/e055823)
Supplement: inline-supplementary-material-4 [file inline-supplementary-material-4.pdf]

**Supplementary file 4. Clinicians' checklist items to follow before, during and after a consultation according to the articles/guidelines included in the review.**

| Clinicians' checklist items                                                                                                                                    | Authors                                                                                    |
|----------------------------------------------------------------------------------------------------------------------------------------------------------------|--------------------------------------------------------------------------------------------|
| <b>Before a consultation</b>                                                                                                                                   |                                                                                            |
| Identify yourself and your role                                                                                                                                | Bierman et al. (1), Quigley et al. (2),                                                    |
| Verify patient's identity                                                                                                                                      | Bierman et al. (1), Middleton et al. (3), Quigley et al. (2), Wong et al. (4)              |
| Obtain patient's consent                                                                                                                                       | The Institute of Osteopathy (5), RCSLT (6), Wong et al. (4)                                |
| Announce who is in the meeting and ask the patient to introduce anyone observing the consultation from his end                                                 | The Institute of Osteopathy (5), Wong et al. (4)                                           |
| Check whether there are alternative communication means case of technology issues or emergency and provide the patient with their alternative contact details. | Bierman et al. (2018), Wong et al. (4)                                                     |
| Check that the audio and video conferencing devices are working and positioned properly                                                                        | Wong et al. (4), Middleton et al. (3)                                                      |
| Ensure that the room is adequate for the consultation                                                                                                          | Middleton et al. (3)                                                                       |
| Ensure that the room does not contain any distractions                                                                                                         | RCSLT (6)                                                                                  |
| Ensure that the equipment needed for treatment or assessment is within reach                                                                                   | Middleton et al. (3), RCSLT (6)                                                            |
| Check whether family's or caregiver's support is available if needed                                                                                           | Middleton et al. (3)                                                                       |
| Ensure that the information given to the patient has been fully and correctly understood                                                                       | Meredith et al. (7), The Institute of Osteopathy (5), RCSLT (6)                            |
| Ensure beforehand to have access to the patient notes and any other relevant documentation                                                                     | The Institute of Osteopathy (5)                                                            |
| <b>During a consultation</b>                                                                                                                                   |                                                                                            |
| Take patient's history including patient's demographics, clinical symptoms, psychosocial information and ask the patient whether there have                    | The Institute of Osteopathy (5), Bierman et al. (1), Middleton et al. (3), Wong et al. (4) |

|                                                                                            |                                                                                                   |
|--------------------------------------------------------------------------------------------|---------------------------------------------------------------------------------------------------|
| been any changes in the clinical condition or any adverse event (e.g., fall)               |                                                                                                   |
| Conduct the assessment                                                                     | Bierman et al. (1), Ben-Aharon et al. (8), Middleton et al. (3), Doll et al. (9), Wong et al. (4) |
| Carry out the treatment                                                                    | Ben-Aharon et al. (8), Bierman et al. (1), Doll et al. (9)                                        |
| Explore patient's and his family's expectations                                            | RCSLT (6)                                                                                         |
| Establish a plan                                                                           | Wong et al. (4)                                                                                   |
| <b>After a consultation</b>                                                                |                                                                                                   |
| Summarise the key points                                                                   | The Institute of Osteopathy (5)                                                                   |
| Ask the patient whether there are any questions                                            | The Institute of Osteopathy (5), RCSLT (6)                                                        |
| Determine whether the next session will be remote through discussion with the patient      | The Institute of Osteopathy (5), Wong et al. (4)                                                  |
| Arrange the next appointment and send the patient instructions or resources as appropriate | BAPO (10), RCSLT (6)                                                                              |

Abbreviations: RCSLT, The Royal College of Speech and Language Therapists; BAPO, The British Association of Prosthetists and Orthotists.

## REFERENCE LIST

1. Bierman RT, Kwong MW, Calouro C. State Occupational and Physical Therapy Telehealth Laws and Regulations: A 50-State Survey. *International journal of telerehabilitation*. 2018 Dec 11;10(2):3–54.
2. Quigley A, Johnson H, McArthur C. Transforming the Provision of Physiotherapy in the Time of COVID-19: A Call to Action for Telerehabilitation. *Physiotherapy Canada*. 2021;73(1):1–2.
3. Middleton A, Simpson KN, Bettger JP, Bowden MG. COVID-19 Pandemic and Beyond: Considerations and Costs of Telehealth Exercise Programs for Older Adults With Functional Impairments Living at Home-Lessons Learned From a Pilot Case Study. *Physical therapy*. 2020 Aug 12;100(8):1278–88.
4. Wong A, Bhyat R, Srivastava S, Boissé Lomax L, Appireddy R. Patient Care During the COVID-19 Pandemic: Use of Virtual Care. *Journal of medical Internet research*. 2021 Jan 21;23(1):e20621.
5. The Institute of Osteopathy. A guide to telephone and video consultations in osteopathic practice. 2020.
6. The Royal College of Speech and Language Therapist - RCSLT. Telehealth guidance. 2020. Available from: [rcslt.org/members/delivering-quality-services/telehealth/telehealth-guidance/](https://rcslt.org/members/delivering-quality-services/telehealth/telehealth-guidance/)
7. Meredith G, Firmin S, McAllister L. Digital possibilities and ethical considerations: Speech-language pathologists and the web. *Journal of Clinical Practice in Speech-Language*. 2013 Feb;15(1):44–7.

8. Ben-Aharon A. A Practical Guide to Establishing an Online Speech Therapy Private Practice. Perspectives of the ASHA Special Interest Groups. 2019 Aug;4(4):712–8.
9. Doll EJ, Braden MN, Thibeault SL. COVID-19 and Speech-Language Pathology Clinical Practice of Voice and Upper Airway Disorders. American journal of speech-language pathology. 2021 Jan 27;30(1):63–74.
10. The British Association of Prosthetists and Orthotists (BAPO). Guidelines for Virtual Patient Assessment. 2020; Available from: <https://www.bapo.com/wp-content/uploads/2020/04/BAPO-Virtual-Assessment-Guidelines-compressed.pdf>
